# Supplementary material
Source: PubMed Central journal article supplement (PMC7228100)
Supplement: ehp5838.s001.acco.pdf [file ehp5838.s001.acco.pdf]

**Note to readers with disabilities:** *EHP* strives to ensure that all journal content is accessible to all readers. However, some figures and Supplemental Material published in *EHP* articles may not conform to [508 standards](#) due to the complexity of the information being presented. If you need assistance accessing journal content, please contact [ehp508@niehs.nih.gov](mailto:ehp508@niehs.nih.gov). Our staff will work with you to assess and meet your accessibility needs within 3 working days.

## **Supplemental Material**

### **A Quantile-Based g-Computation Approach to Addressing the Effects of Exposure Mixtures**

Alexander P. Keil, Jessie P. Buckley, Katie M. O'Brien, Kelly K. Ferguson, Shanshan Zhao, and Alexandra J. White

#### **Table of Contents**

**Figure S1.** Large sample simulation results demonstrating the default graphical output of the “qgcomp” R package showing the point estimates of the exposure weights in quantile g-computation (when weights are estimable in a linear/additive model). Under a linear model when effects of exposures are all in the same direction, the weights correspond to the proportion of the total mixture effect that is due to each exposure.

**Figure S2.** Large sample simulation results demonstrating the default graphical output of the “gWQS” R package showing the point estimates of the exposures weights in WQS regression. Under a linear model when effects of exposures are all in the same direction, the weights correspond to the proportion of the total mixture effect that is due to each exposure.

**Figure S3.** Scenario 5: Impact of co-pollutant confounding on the bias of the overall exposure effect estimate (N=500, d=4) for quantile g-computation (q-gcomp) and WQS regression (WQS) at exposure correlations ( $\rho_{x_1x_2}$  of 0.0, 0.4, and 0.75) and varying total effect sizes ( $\psi = \beta_1 + \beta_2 \in 0.2, 0.15, 0.05$ ). Boxes represent the median (center line) and interquartile range (outer lines of box) and outliers (points outside of the 1.5\*IQR length whiskers) across 1,000 simulations.

**Figure S4.** Scenario 5: Impact of co-pollutant confounding on the bias of the overall exposure effect estimate (N=500, d=14) for quantile g-computation (q-gcomp) and WQS regression (WQS) at exposure correlations ( $\rho_{x_1x_2}$  of 0.0, 0.4, and 0.75) and varying total effect sizes ( $\psi = \beta_1 + \beta_2 \in 0.2, 0.15, 0.05$ ). Boxes represent the median (center line) and interquartile range (outer lines of box) and outliers (points outside of the 1.5\*IQR length whiskers) across 1,000 simulations.

**Figure S5.** Scenario 5: Impact of co-pollutant confounding on the bias of the overall exposure effect estimate (N=100, d=4) for quantile g-computation (q-gcomp) and WQS regression (WQS) at exposure correlations ( $\rho_{x_1x_2}$  of 0.0, 0.4, and 0.75) and varying total effect sizes ( $\psi = \beta_1 + \beta_2 \in 0.2, 0.15, 0.05$ ). Boxes represent the median (center line) and interquartile range (outer lines of box) and outliers (points outside of the 1.5\*IQR length whiskers) across 1,000 simulations.

**Figure S6.** Scenario 5: Impact of co-pollutant confounding on the bias of the overall exposure effect estimate (N=100, d=9) for quantile g-computation (q-gcomp) and WQS regression (WQS) at exposure correlations ( $\rho_{x_1x_2}$  of 0.0, 0.4, and 0.75) and varying total effect sizes ( $\psi = \beta_1 + \beta_2 \in 0.2, 0.15, 0.05$ ). Boxes represent the median (center line) and interquartile range (outer lines of box) and outliers (points outside of the 1.5\*IQR length whiskers) across 1,000 simulations.

**Figure S7.** Scenario 5: Impact of co-pollutant confounding on the bias of the overall exposure effect estimate (N=100, d=14) for quantile g-computation (q-gcomp) and WQS regression (WQS) at exposure correlations ( $\rho_{x_1x_2}$  of 0.0, 0.4, and 0.75) and varying total effect sizes ( $\psi = \beta_1 + \beta_2 \in 0.2, 0.15, 0.05$ ). Boxes represent the median (center line) and interquartile range (outer lines of box) and outliers (points outside of the 1.5\*IQR length whiskers) across 1,000 simulations.

**Table S1.** Validity of WQS regression and quantile g-computation under the null (no exposures affect the outcome, or exposures counteract) and non-null estimates when directional homogeneity holds, 1,000 simulated samples of N=100.

**Table S2.** Validity of WQS regression and quantile g-computation under non-null estimates when directional homogeneity holds, individual exposure effects are non-additive, and the overall exposure effect includes terms for linear ( $\psi_1$ ) and squared ( $\psi_2$ ) exposure (e.g. quadratic polynomial), 1,000 simulated samples of N=100.

**Table S3.** Validity of WQS regression without sample splitting and quantile g-computation under the null (no exposures affect the outcome, 1,000 simulated samples of N=500).

**Additional File-** Supplemental Code and Data Files

**Supplementary material for: A quantile-based g-computation approach to addressing the effects of exposure mixtures**

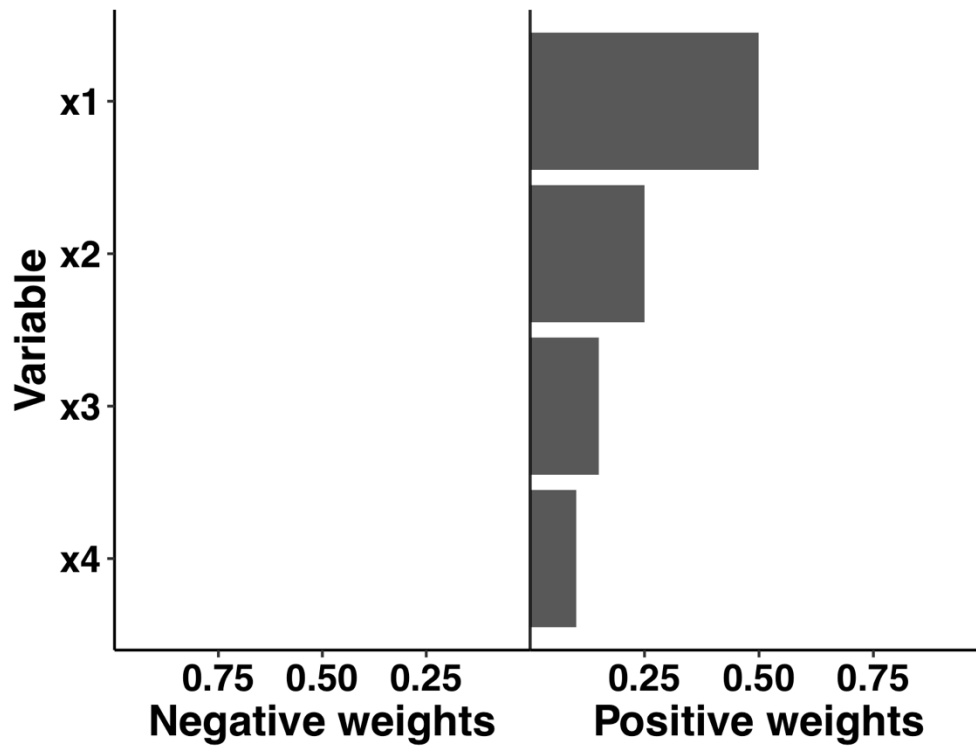

**Figure S1: Large sample simulation results demonstrating the default graphical output of the “qgcomp” R package showing the point estimates of the exposure weights in quantile g-computation (when weights are estimable in a linear/additive model). Under a linear model when effects of exposures are all in the same direction, the weights correspond to the proportion of the total mixture effect that is due to each exposure.**

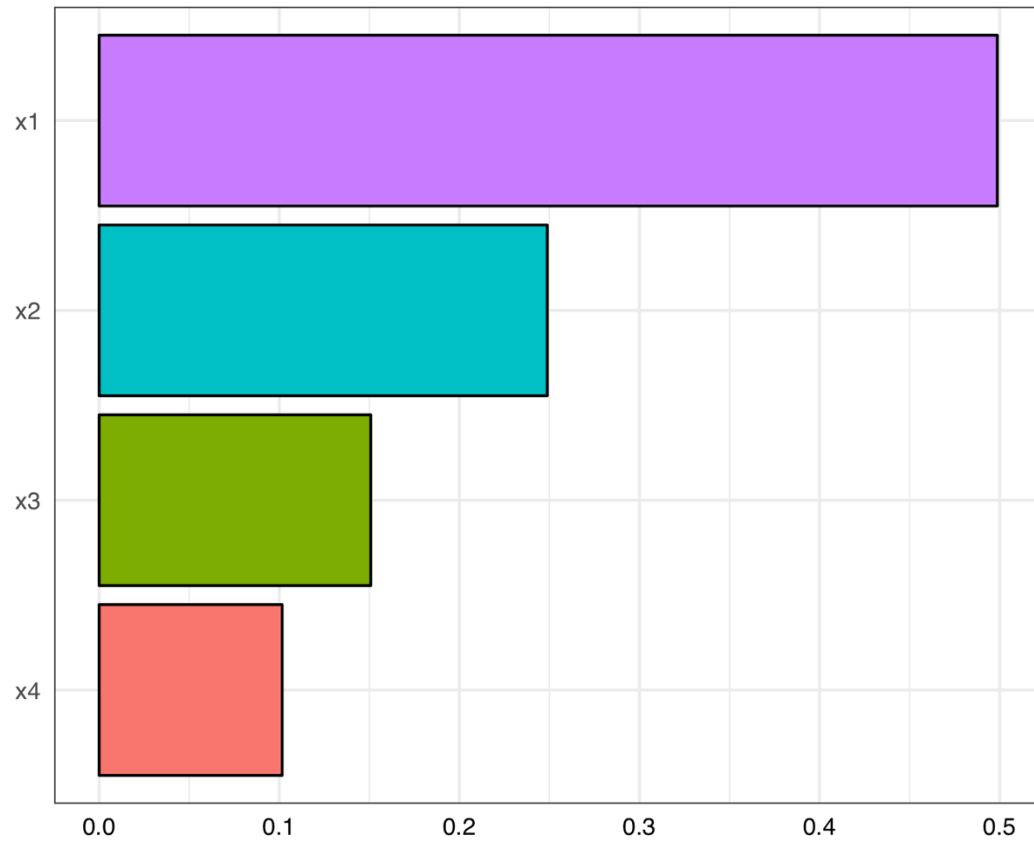

**Figure S2: Large sample simulation results demonstrating the default graphical output of the “gWQS” R package showing the point estimates of the exposures weights in WQS regression. Under a linear model when effects of exposures are all in the same direction, the weights correspond to the proportion of the total mixture effect that is due to each exposure.**

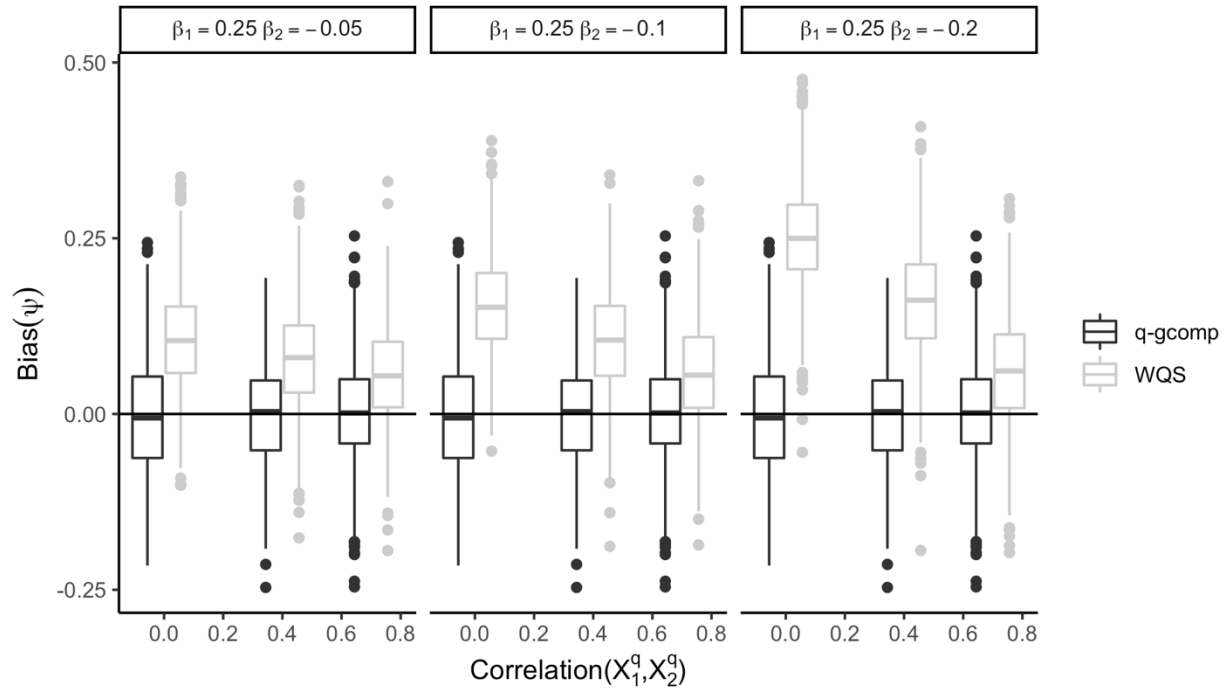

**Figure S3. Scenario 5: Impact of co-pollutant confounding on the bias of the overall exposure effect estimate ( $N=500$ ,  $d=4$ ) for quantile g-computation (q-gcomp) and WQS regression (WQS) at exposure correlations ( $\rho_{X_1 X_2}$  of 0.0, 0.4, and 0.75) and varying total effect sizes ( $\psi = \beta_1 + \beta_2 \in 0.2, 0.15, 0.05$ ). Boxes represent the median (center line) and interquartile range (outer lines of box) and outliers (points outside of the  $1.5 \cdot \text{IQR}$  length whiskers) across 1,000 simulations.**

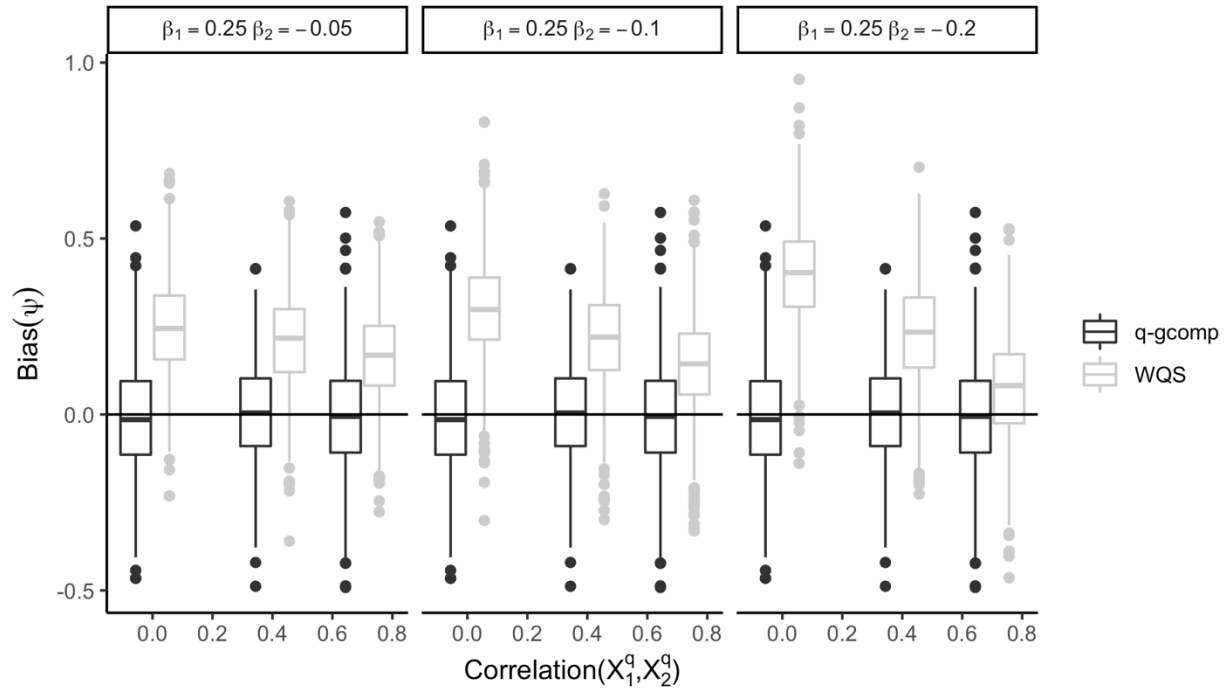

**Figure S4. Scenario 5: Impact of co-pollutant confounding on the bias of the overall exposure effect estimate ( $N=500$ ,  $d=14$ ) for quantile g-computation (q-gcomp) and WQS regression (WQS) at exposure correlations ( $\rho_{X_1X_2}$  of 0.0, 0.4, and 0.75) and varying total effect sizes ( $\psi = \beta_1 + \beta_2 \in 0.2, 0.15, 0.05$ ). Boxes represent the median (center line) and interquartile range (outer lines of box) and outliers (points outside of the  $1.5 \times \text{IQR}$  length whiskers) across 1,000 simulations.**

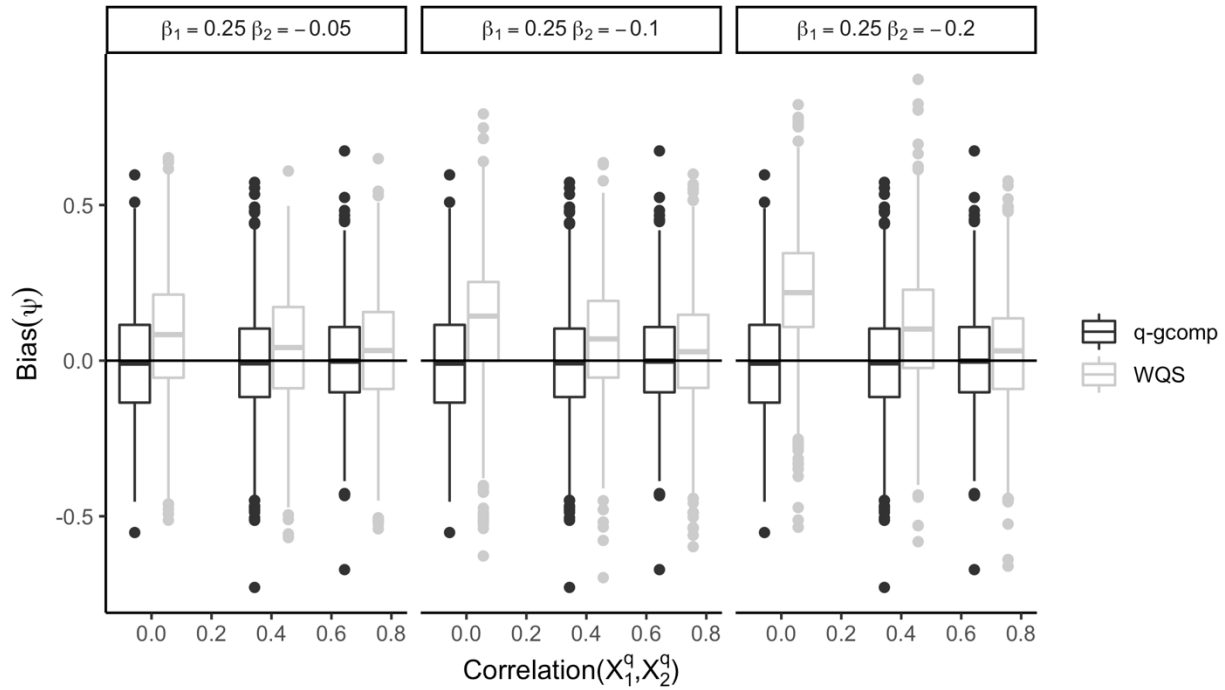

**Figure S5. Scenario 5: Impact of co-pollutant confounding on the bias of the overall exposure effect estimate ( $N=100$ ,  $d=4$ ) for quantile g-computation (q-gcomp) and WQS regression (WQS) at exposure correlations ( $\rho_{X_1 X_2}$  of 0.0, 0.4, and 0.75) and varying total effect sizes ( $\psi = \beta_1 + \beta_2 \in 0.2, 0.15, 0.05$ ). Boxes represent the median (center line) and interquartile range (outer lines of box) and outliers (points outside of the  $1.5 \cdot \text{IQR}$  length whiskers) across 1,000 simulations.**

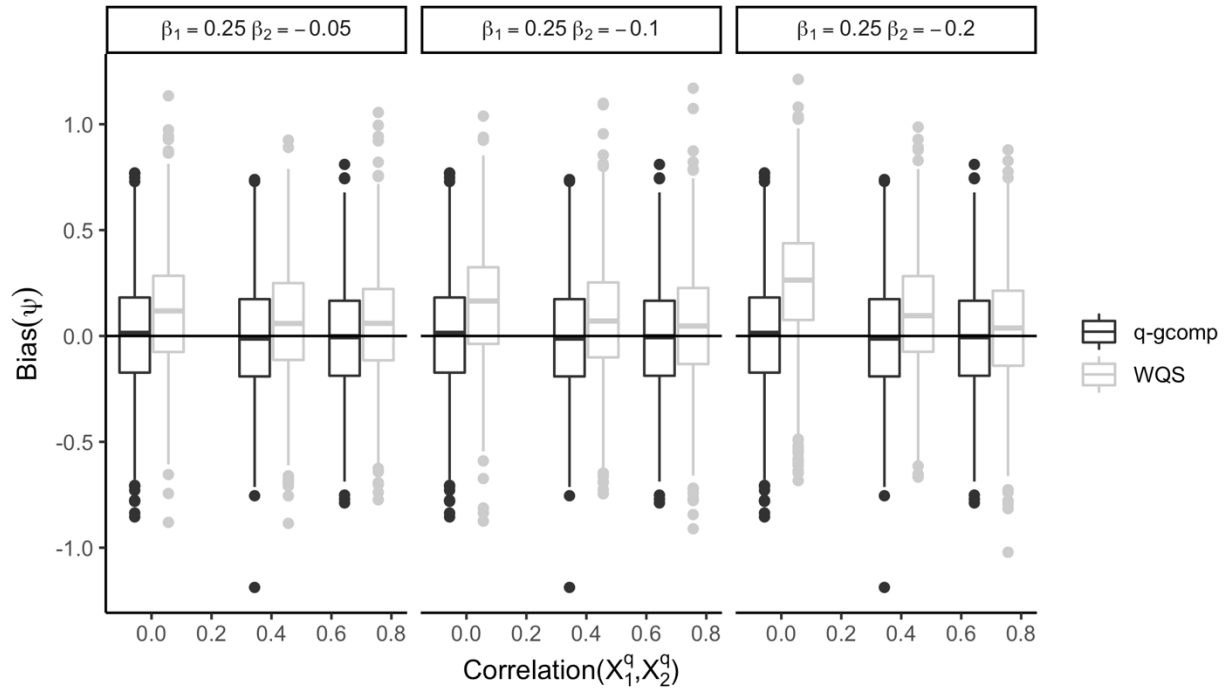

**Figure S6. Scenario 5: Impact of co-pollutant confounding on the bias of the overall exposure effect estimate ( $N=100$ ,  $d=9$ ) for quantile g-computation (q-gcomp) and WQS regression (WQS) at exposure correlations ( $\rho_{X_1X_2}$  of 0.0, 0.4, and 0.75) and varying total effect sizes ( $\psi = \beta_1 + \beta_2 \in 0.2, 0.15, 0.05$ ). Boxes represent the median (center line) and interquartile range (outer lines of box) and outliers (points outside of the  $1.5 \cdot \text{IQR}$  length whiskers) across 1,000 simulations.**



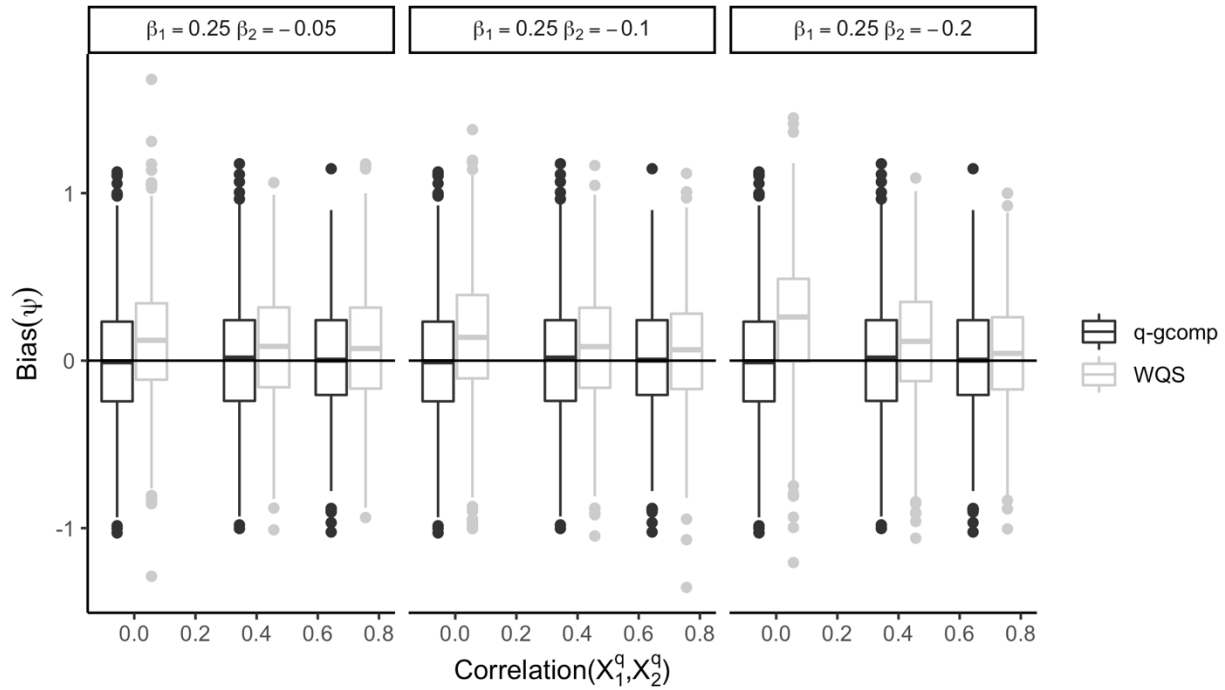

**Figure S7. Scenario 5: Impact of co-pollutant confounding on the bias of the overall exposure effect estimate ( $N=100, d=14$ ) for quantile g-computation (q-gcomp) and WQS regression (WQS) at exposure correlations ( $\rho_{X_1X_2}$  of 0.0, 0.4, and 0.75) and varying total effect sizes ( $\psi = \beta_1 + \beta_2 \in 0.2, 0.15, 0.05$ ). Boxes represent the median (center line) and interquartile range (outer lines of box) and outliers (points outside of the  $1.5 \times \text{IQR}$  length whiskers) across 1,000 simulations.**

APPENDIX TABLES

**Table S1: Validity of WQS regression and quantile g-computation under the null (no exposures affect the outcome, or exposures counteract) and non-null estimates when directional homogeneity holds, 1,000 simulated samples of N=100.**

| Scenario                                                                         | Method               | d <sup>a</sup> | Truth <sup>b</sup> | Bias <sup>c</sup> | MCSE <sup>d</sup> | RMVAR <sup>e</sup> | Coverage <sup>f</sup> | Power/<br>Type 1<br>error <sup>g</sup> |
|----------------------------------------------------------------------------------|----------------------|----------------|--------------------|-------------------|-------------------|--------------------|-----------------------|----------------------------------------|
| 1. Validity<br>under the null,<br>no exposures are<br>causal                     | WQS <sup>h</sup>     | 4              | 0                  | 0.00              | 0.19              | 0.20               | 0.95                  | 0.05                                   |
|                                                                                  |                      | 9              | 0                  | 0.02              | 0.27              | 0.27               | 0.94                  | 0.06                                   |
|                                                                                  |                      | 14             | 0                  | 0.00              | 0.34              | 0.34               | 0.95                  | 0.05                                   |
|                                                                                  | Q-gcomp <sup>i</sup> | 4              | 0                  | 0.00              | 0.18              | 0.18               | 0.95                  | 0.05                                   |
|                                                                                  |                      | 9              | 0                  | 0.02              | 0.28              | 0.28               | 0.94                  | 0.06                                   |
|                                                                                  |                      | 14             | 0                  | 0.00              | 0.36              | 0.36               | 0.95                  | 0.05                                   |
| 2. Validity<br>under the null,<br>causal exposures<br>counteract                 | WQS <sup>h</sup>     | 4              | 0                  | 0.28              | 0.22              | 0.20               | 0.67                  | 0.33                                   |
|                                                                                  |                      | 9              | 0                  | 0.30              | 0.32              | 0.29               | 0.78                  | 0.22                                   |
|                                                                                  |                      | 14             | 0                  | 0.28              | 0.39              | 0.35               | 0.83                  | 0.17                                   |
|                                                                                  | Q-gcomp <sup>i</sup> | 4              | 0                  | 0.00              | 0.20              | 0.20               | 0.96                  | 0.04                                   |
|                                                                                  |                      | 9              | 0                  | 0.01              | 0.30              | 0.30               | 0.95                  | 0.05                                   |
|                                                                                  |                      | 14             | 0                  | -0.02             | 0.38              | 0.38               | 0.94                  | 0.06                                   |
| 3. Validity<br>under single<br>non-null effect                                   | WQS <sup>h</sup>     | 4              | 0.25               | 0.04              | 0.21              | 0.19               | 0.92                  | 0.37                                   |
|                                                                                  |                      | 9              | 0.25               | 0.09              | 0.29              | 0.27               | 0.91                  | 0.27                                   |
|                                                                                  |                      | 14             | 0.25               | 0.07              | 0.36              | 0.34               | 0.92                  | 0.19                                   |
|                                                                                  | Q-gcomp <sup>i</sup> | 4              | 0.25               | 0.00              | 0.18              | 0.18               | 0.95                  | 0.29                                   |
|                                                                                  |                      | 9              | 0.25               | 0.02              | 0.28              | 0.28               | 0.94                  | 0.16                                   |
|                                                                                  |                      | 14             | 0.25               | 0.00              | 0.36              | 0.36               | 0.95                  | 0.12                                   |
| 4. Validity<br>under all non-<br>null effects with<br>directional<br>homogeneity | WQS <sup>h</sup>     | 4              | 0.25               | -0.07             | 0.20              | 0.20               | 0.93                  | 0.15                                   |
|                                                                                  |                      | 9              | 0.25               | -0.07             | 0.28              | 0.28               | 0.94                  | 0.11                                   |
|                                                                                  |                      | 14             | 0.25               | -0.12             | 0.34              | 0.34               | 0.93                  | 0.08                                   |
|                                                                                  | Q-gcomp <sup>i</sup> | 4              | 0.25               | -0.01             | 0.18              | 0.18               | 0.95                  | 0.26                                   |
|                                                                                  |                      | 9              | 0.25               | 0.00              | 0.27              | 0.28               | 0.95                  | 0.15                                   |
|                                                                                  |                      | 14             | 0.25               | 0.00              | 0.36              | 0.36               | 0.94                  | 0.11                                   |

<sup>a</sup>Total number of exposures in the model

<sup>b</sup>True value of  $\psi$ , the net effect of the exposure mixture

<sup>c</sup>Estimate of  $\psi$  minus the true value

<sup>d</sup>Standard deviation of the bias across 1000 iterations

<sup>e</sup>Square root of the mean of the variance estimates from the 1000 simulations, should equal MCSE if the variance estimator is unbiased

<sup>f</sup>Proportion of simulations in which the estimated 95% confidence interval contained the truth.

<sup>g</sup>Power when the effect is non-null, otherwise is the type 1 error rate (false rejection of null), which should equal alpha (0.05 here) under a valid test

<sup>h</sup>WQS regression (R package “gWQS” defaults)

<sup>i</sup>Quantile g-computation (R package “qgcomp” defaults)

**Table S2: Validity of WQS regression and quantile g-computation under non-null estimates when directional homogeneity holds, individual exposure effects are non-additive, and the overall exposure effect includes terms for linear ( $\psi_1$ ) and squared ( $\psi_2$ ) exposure (e.g. quadratic polynomial), 1,000 simulated samples of N=100.**

| Scenario                                                                                        | Method               | d <sup>a</sup> | Bias <sup>b</sup> |          | MCSE <sup>c</sup> |          | RMVAR <sup>d</sup> |          |
|-------------------------------------------------------------------------------------------------|----------------------|----------------|-------------------|----------|-------------------|----------|--------------------|----------|
|                                                                                                 |                      |                | $\psi_1$          | $\psi_2$ | $\psi_1$          | $\psi_2$ | $\psi_1$           | $\psi_2$ |
| 7. Validity when the true exposure effect is non-additive/non-linear                            | WQS <sup>e</sup>     | 4              | 0.13              | -0.04    | 0.78              | 0.25     | 0.75               | 0.24     |
|                                                                                                 |                      | 9              | -0.08             | 0.02     | 1.69              | 0.56     | 1.67               | 0.55     |
|                                                                                                 |                      | 14             | -0.24             | 0.08     | 2.61              | 0.87     | 2.69               | 0.89     |
|                                                                                                 | Q-gcomp <sup>f</sup> | 4              | 0.00              | 0.00     | 0.30              | 0.08     | 0.29               | 0.08     |
|                                                                                                 |                      | 9              | 0.01              | 0.00     | 0.36              | 0.08     | 0.37               | 0.09     |
|                                                                                                 |                      | 14             | -0.02             | 0.00     | 0.43              | 0.09     | 0.45               | 0.09     |
| 8. Validity when the overall exposure effect is non-linear due to underlying non-linear effects | WQS <sup>e</sup>     | 4              | -0.21             | 0.07     | 0.74              | 0.24     | 0.77               | 0.25     |
|                                                                                                 |                      | 9              | -0.25             | 0.09     | 1.68              | 0.55     | 1.71               | 0.56     |
|                                                                                                 |                      | 14             | -0.39             | 0.13     | 2.63              | 0.87     | 2.77               | 0.91     |
|                                                                                                 | Q-gcomp <sup>f</sup> | 4              | 0.00              | 0.00     | 0.34              | 0.10     | 0.34               | 0.10     |
|                                                                                                 |                      | 9              | 0.00              | 0.00     | 0.41              | 0.10     | 0.41               | 0.10     |
|                                                                                                 |                      | 14             | -0.01             | 0.00     | 0.46              | 0.11     | 0.49               | 0.11     |

<sup>a</sup>Total number of exposures in the model

<sup>b</sup>Estimate of  $\psi_1$  or  $\psi_2$  minus the true value

<sup>c</sup>Standard deviation of the bias across 1000 iterations

<sup>d</sup>Square root of the mean of the variance estimates from the 1000 simulations, should equal MCSE if the variance estimator is unbiased

<sup>e</sup>WQS regression (R package “gWQS” defaults, allowing for quadratic term for total exposure effect)

<sup>f</sup>Quantile g-computation (R package “qgcomp” defaults, including interaction term between  $X_1$  and  $X_2$  (scenario 7) or a term for  $X_1X_1$  (scenario 8) as well as quadratic term for total exposure effect)

**Table S3: Validity of WQS regression without sample splitting and quantile g-computation under the null (no exposures affect the outcome, 1,000 simulated samples of N=500).**

| Scenario                                               | Method               | df <sup>a</sup> | Truth <sup>b</sup> | Bias <sup>c</sup> | MCSE <sup>d</sup> | RMVAR <sup>e</sup> | Type 1 error <sup>f</sup> |
|--------------------------------------------------------|----------------------|-----------------|--------------------|-------------------|-------------------|--------------------|---------------------------|
| 1. Validity under the null,<br>no exposures are causal | WQS <sup>g</sup>     | 4               | 0                  | 0.06              | 0.06              | 0.07               | 0.86                      |
|                                                        |                      | 9               | 0                  | 0.15              | 0.09              | 0.09               | 0.65                      |
|                                                        |                      | 14              | 0                  | 0.25              | 0.10              | 0.11               | 0.38                      |
|                                                        | Q-gcomp <sup>h</sup> | 4               | 0                  | 0.00              | 0.08              | 0.08               | 0.06                      |
|                                                        |                      | 9               | 0                  | 0.00              | 0.12              | 0.12               | 0.05                      |
|                                                        |                      | 14              | 0                  | -0.01             | 0.16              | 0.15               | 0.05                      |

<sup>a</sup>Total number of exposures in the model

<sup>b</sup>True value of  $\psi$ , the net effect of the exposure mixture

<sup>c</sup>Estimate of  $\psi$  minus the true value

<sup>d</sup>Standard deviation of the bias across 1000 iterations

<sup>e</sup>Square root of the mean of the variance estimates from the 1000 simulations, should equal MCSE if the variance estimator is unbiased

<sup>f</sup>Type 1 error rate (false rejection of null), which should equal alpha (0.05 here) under a valid test

<sup>g</sup>WQS regression (R package “gWQS”, validation parameter set to 0)

<sup>h</sup>Quantile g-computation (R package “qgcomp” defaults). Results are repeated from Table 3 in the main text for reference.
